# Supplementary material
Source: ML conference proceedings conference paper supplement (https://proceedings.neurips.cc/paper_files/paper/2019/hash/312351bff07989769097660a56395065-Abstract.html)
Supplement: Supplementary file [file 312351bff07989769097660a56395065-Supplemental.zip]

---

## SUPPLEMENTARY MATERIAL

### Exact inference in structured prediction

---

#### A Detailed Proofs

In this section, we state the proofs of Theorem 3 and Corollaries 1, 2, 3 from our manuscript.

##### A.1 Proof of Theorem 3

*Proof.* We are interested in upper bounding the probability of predicting the wrong vector  $\mathbf{y}$ , that is,

$$\begin{aligned} P(\mathbf{c}^\top \mathbf{y}^* \leq -\mathbf{c}^\top \mathbf{y}^*) &= P(\mathbf{c}^\top \mathbf{y}^* \leq 0) \\ &= P\left(\sum_{u \in \mathcal{V}} z_q^{(u)} \leq 0\right) \\ &\leq e^{-\frac{n}{2}(1-2q)^2}, \end{aligned}$$

where for the last equation we applied Hoeffding's inequality.  $\square$

##### A.2 Proof of Corollary 1

*Proof.* Fix  $\varepsilon = \log^8 n$ . Let  $\epsilon_r(n, \varepsilon) = n^{-2.2 - \frac{\log \varepsilon}{2}}$ , then from Lemma 3 we get  $\phi_{\tilde{\mathcal{G}}} \in \Omega(\log^7 n)$  with probability at least  $1 - \epsilon_r(n, \varepsilon)$ . Let  $\Delta_{\max}$  be the maximum node degree of graph  $\mathcal{G}$ , then it is clear that  $\Delta_{\max}^{\tilde{\mathcal{G}}}$  is a random variable with expected value  $\mathbb{E}[\Delta_{\max}^{\tilde{\mathcal{G}}}] \leq \Delta_{\max} + \log^8 n$ . By applying Markov's inequality we obtain  $P(\Delta_{\max}^{\tilde{\mathcal{G}}} \geq t) \leq \mathbb{E}[\Delta_{\max}^{\tilde{\mathcal{G}}}] / t \leq (\Delta_{\max} + \log^8 n) / t$  for  $t > 0$ . Set  $t = \log^9 n$ , then let  $\epsilon_{\Delta}(\Delta_{\max}, n) = (\Delta_{\max} + \log^8 n) / \log^9 n$ , we have that  $\Delta_{\max}^{\tilde{\mathcal{G}}} \leq \log^9 n$  with probability at least  $1 - \epsilon_{\Delta}(\Delta_{\max}, n)$ .

By using the union bound and noting that  $\epsilon_r \rightarrow 0$  and  $\epsilon_{\Delta} \rightarrow 0$  as  $n \rightarrow \infty$ , we have that  $\phi_{\tilde{\mathcal{G}}}^2 / \Delta_{\max}^{\tilde{\mathcal{G}}} \in \Omega(\log^5 n)$  and  $\Delta_{\max}^{\tilde{\mathcal{G}}} \in \mathcal{O}(\log^9 n)$  with high probability. Finally, this leads to  $\epsilon_1 \rightarrow 0$  as  $n \rightarrow \infty$ , thus, exact inference is achievable in polynomial time.  $\square$

##### A.3 Proof of Corollary 2

*Proof.* For any set  $\mathcal{S} \subset \mathcal{V}$  with  $|\mathcal{S}| \leq n/2$ , we have that:

$$\phi_{\mathcal{S}} = \frac{|\mathcal{E}(\mathcal{S}, \mathcal{S}^C)|}{|\mathcal{S}|} = \frac{|\mathcal{S}| \cdot |\mathcal{S}^C|}{|\mathcal{S}|} = |\mathcal{S}^C| \implies \phi_{\mathcal{G}} = \lceil \frac{n}{2} \rceil.$$

Since  $\mathcal{G}$  is a complete graph, we have that  $\Delta_{\max} = n - 1$ , which yields  $\phi_{\mathcal{G}}^2 / \Delta_{\max} \in \Omega(n)$ . Thus, from Theorem 2, we have that  $\epsilon_1(\phi_{\mathcal{G}}, \Delta_{\max}, p) \rightarrow 0$  as  $n \rightarrow \infty$ .  $\square$

##### A.4 Proof of Corollary 3

*Proof.* From Definition 6, we have that  $\phi_{\mathcal{G}} \geq c \cdot d$ . Since the graph is regular, we have that  $\Delta_{\max} = d$ . Therefore,  $\phi_{\mathcal{G}}^2 / \Delta_{\max} \in \Omega(d)$ . Finally, if  $d \in \Omega(\log n)$ , then  $\epsilon_1(\phi_{\mathcal{G}}, \Delta_{\max}, p)$  decays in at least  $n^{-c_1}$  for some constant  $c_1 > 0$ . That is,  $\epsilon_1(\phi_{\mathcal{G}}, \Delta_{\max}, p) \rightarrow 0$  as  $n \rightarrow \infty$ .  $\square$
